# Supplementary material for: Increasing the limits of energy and safety in tetrazoles: dioximes as unusual precursors to very thermostable and insensitive energetic materials
Source: Royal Society of Chemistry journal article supplement (doi:10.1039/d2ta09324c), 2023-01-01
Supplement: d2ta09324c1.pdf [file d2ta09324c1.pdf]

## Electronic Supplementary Information (ESI)

# Increasing the limits of energy and safety in tetrazoles: Dioximes as unusual precursors to very thermostable and insensitive energetic materials

Jatinder Singh<sup>a</sup>, Richard J. Staples<sup>b</sup>, Jean'ne M. Shreeve<sup>a,\*</sup>

<sup>a</sup>Department of Chemistry, University of Idaho, Moscow, Idaho, 83844-2343, United States.

<sup>b</sup>Department of Chemistry, Michigan State University, East Lansing, Michigan 48824, United States.

### Corresponding Author

**Jean'ne M. Shreeve** – Department of Chemistry, University of Idaho, Moscow, Idaho 83844-2343, United States; orcid.org/0000-0001-8622-4897; Email: jshreeve@uidaho.edu; Fax: (+1) 208-885-5173.

### Table of contents

|                                                                        |        |
|------------------------------------------------------------------------|--------|
| Isodesmic reactions                                                    | S2     |
| Experimental section, synthesis of compounds <b>3-5, 9</b>             | S2-S6  |
| References                                                             | S6-S7  |
| Crystal structure of compounds <b>5</b> and <b>6</b>                   | S8-S9  |
| <sup>1</sup> H and <sup>13</sup> C-NMR spectra of compounds <b>3-9</b> | S9-S16 |

## Isodesmic reactions

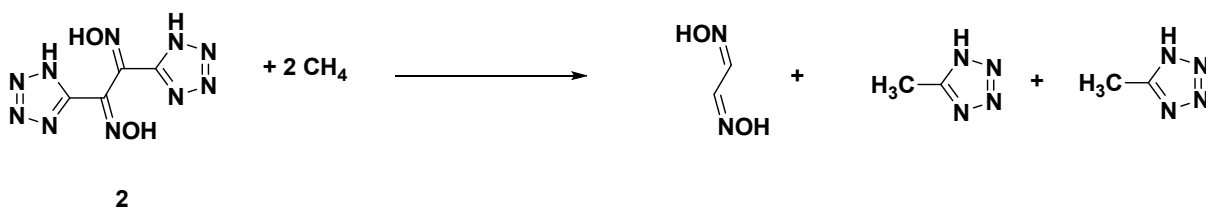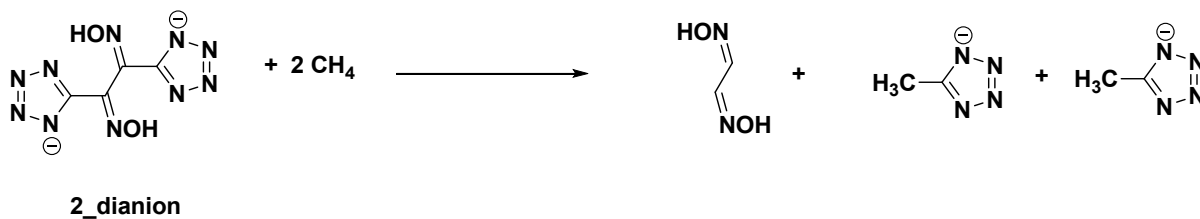

| Compound  | ZPE      | Hcorr    | scaled ZPE | $\Delta HT$ | Mp-6-311++g** | Corrected  | $\Delta Hr$ | $\Delta Hr$ (kJ/mol) | $\Delta Hf$ (kJ/mol) |
|-----------|----------|----------|------------|-------------|---------------|------------|-------------|----------------------|----------------------|
| 2         | 0.126563 | 0.140766 | 0.12150    | 0.014203    | -850.6497469  | -850.51404 | 0.01638286  | 43.0131948           | 666.1280569          |
| 2 dianion | 0.099705 | 0.113359 | 0.09572    | 0.013654    | -849.5294912  | -849.42012 | -0.03814988 | -100.1625003         | 524.2947199          |

Scheme S1: Isodesmic reactions for compound **2** and its corresponding dianion.

## Experimental section

### Caution!

All compounds should be synthesized in milligram amounts. The compounds are energetic materials which show increased sensitivities toward various stimuli (e.g., higher temperatures, impact, and friction). Proper safety precautions such as leather gloves, face shield, and eye protection must be observed at all times when synthesizing and handling these materials.

### General methods

All reagents (analytical grade) were purchased from AK Scientific or VWR and were used as supplied.  $^1H$ ,  $^{13}C$  NMR spectra were recorded using a 300 MHz (Bruker) NMR spectrometer operating at 300.17, and 75.47 MHz, respectively.  $^{15}N$  NMR were recorded using a 500 MHz (Bruker Advance) NMR spectrometer operating at 50.69 MHz. Chemical shifts in the  $^1H$  and  $^{13}C$  NMR spectra are reported relative to  $Me_4Si$  and  $^{15}N$  NMR spectra to  $MeNO_2$  as an external standard. Abbreviations for multiplicities and descriptors are: s = singlet, br = broad signal, m

= multiplet (denotes complex pattern), and q = quartet. The decomposition temperatures (onset) were obtained on a differential scanning calorimeter (TA Instruments Company, Q2000) at a scan rate of 5 °C min<sup>-1</sup>. Infra-red spectra were recorded on a FT-IR spectrometer (Thermo Nicolet AVATAR 370) as thin films using KBr plates. The room temperature densities were measured at 25 °C by employing a gas pycnometer (Micromeritics AccuPyc II 1340). The impact and friction sensitivities were determined by using a standard BAM drop hammer and BAM friction tester. Elemental analyses were carried out on a Vario Micro cube Elementar Analyser.

Single crystals of **3**, **5** and **6** suitable for single-crystal X-ray analysis were obtained by cooling their saturated solutions in methanol/H<sub>2</sub>O. Colorless block-shaped crystals of **3**, **5** and **6** with dimensions 0.33 × 0.03 × 0.02 mm<sup>3</sup>, 0.08 × 0.06 × 0.01 mm<sup>3</sup> and 0.14 × 0.12 × 0.01 mm<sup>3</sup>, respectively, were selected and mounted on a nylon loop with Paratone oil on a XtaLAB Synergy, Dualflex, HyPix diffractometer. The crystals were kept at a steady  $T = 100$  K during data collection. The structures were solved with the ShelXT<sup>1</sup> solution program using dual methods and by using Olex2.<sup>2</sup> The model was refined with ShelXL<sup>3</sup> using full matrix least squares minimization on  $F^2$ .

### **Theoretical study**

The HOFs (heats of formation) of compound **2** and its dianion were calculated by using isodesmic reactions. The single crystal structures were used for the geometric optimization and frequency analyses using the B3LYP functional with the 6-31+G\*\* basis set. The single-point energies were obtained at the MP2/6-311++G\*\* level.<sup>4</sup> The atomization energies for cations were calculated by using the *G<sup>2</sup>ab initio* method.<sup>5</sup> All of the optimized structures were characterized to be true local energy minima on the potential energy surface without imaginary frequencies. In case of the energetic salts, the solid-phase heats of formation were obtained based on a Born–Haber energy cycle.<sup>6</sup> All calculated gas-phase enthalpies for covalent

materials are converted to solid phase values by subtracting the empirical heat of sublimation obtained based on Trouton's rule.<sup>7</sup>

Compounds **6** and **8** characterization data matches with the literature data.<sup>8,9</sup> Compound **7** was prepared following a literature procedure.<sup>10</sup>

### Synthesis of compound **2**

Compound **1** can be prepared in three steps from glyoxal (40% in water).<sup>11</sup> To a 200 mL round-bottomed flask was added **1** (1.00 g, 7.24 mmol), sodium azide (1.04 g, 15.93 mmol), zinc bromide (0.82 g, 3.62 mmol), and water (50 mL). The reaction mixture was stirred at reflux for 24 h. After cooling, HCl (2M, 20 mL) was added to the reaction mixture with vigorous stirring. The reaction mixture was heated at 50 °C, cooled and the resulting precipitate was filtered and washed with distilled water (3 x 30 mL) to obtain **2** as a white solid. (**2**): Physical description: Amorphous white solid. Yield: (1.50 g, 93%);  $T_d$  (onset) = 281 °C;  $^1\text{H}$  NMR (300 MHz, ppm,  $d_6$ -DMSO): 13.48 (br, NH),  $^{13}\text{C}$  NMR (75 MHz, ppm,  $d_6$ -DMSO): 146.3, 139.7; IR ( $\nu$ ,  $\text{cm}^{-1}$ ): 3076, 3004, 2880, 2804, 1620, 1517, 1430, 1388, 1339, 1243, 1121, 1067, 1012, 867, 799, 758, 743, 715; Elemental analysis: Calcd (%) for  $\text{C}_4\text{H}_4\text{N}_{10}\text{O}_2$  (224.14): C, 21.43; H, 1.80; N, 62.49; Found: C, 21.12; H, 2.10; N, 61.70.

### General procedure for the synthesis of energetic salts

Base (2.0 mmol) was added to a suspension of **2** (1.0 mmol) in  $\text{CH}_3\text{CN}$  (30 mL). The reaction mixture was stirred for 3h. The resulting precipitate was collected by filtration to give the product, which was purified further by washing with  $\text{CH}_3\text{CN}$  (3 x 10 mL).

(**3**): Physical description: Amorphous white solid. Isolated yield: 95%;  $T_{\text{dec}}$  (onset) = 281 °C;  $^1\text{H}$  NMR (300 MHz, ppm,  $d_6$ -DMSO): 7.35 (br, 6H);  $^{13}\text{C}$  NMR (75 MHz, ppm,  $d_6$ -DMSO): 153.5, 143.1; IR ( $\nu$ ,  $\text{cm}^{-1}$ ): 2712, 1640, 1533, 1435, 1361, 1239, 1261, 1167, 121, 1110, 1056, 1028, 997, 891; Elemental analysis: Calcd (%) for  $\text{C}_4\text{H}_{10}\text{N}_{12}\text{O}_4$  (290.20): C, 16.56; H, 3.47; N, 57.92; Found: C 16.61, H 3.75, N 57.32.

**(4)**: Physical description: Amorphous white solid. Isolated yield: 91%;  $T_{\text{dec. (onset)}} = 290\text{ }^{\circ}\text{C}$ ;  $^1\text{H}$  NMR (300 MHz,  $d_6$ -DMSO): 6.31 (br, 8H),;  $^{13}\text{C}$  NMR (75 MHz,  $d_6$ -DMSO): 155.7, 143.4; IR ( $\nu$ ,  $\text{cm}^{-1}$ ): 2685, 1660, 1520, 1461, 1420, 1356, 1212, 1193, 1108, 1080; Elemental analysis: Calcd (%) for  $\text{C}_4\text{H}_{10}\text{N}_{12}\text{O}_2$  (258.20): C, 18.61; H, 3.90; N, 65.10; Found: C 18.82, H 3.60, N 64.63.

**(5)**: Isolated yield: 90%;  $T_{\text{dec. (onset)}} = 238\text{ }^{\circ}\text{C}$ ;  $^1\text{H}$  NMR (300 MHz,  $d_6$ -DMSO): 11.6 (bs, 4H), 7.29 (bs, 6H), 6.94 (s, 2H), 5.71 (s, 4H);  $^{13}\text{C}$  NMR (75 MHz,  $d_6$ -DMSO): 159.7, 152.2, 148.0, 142.1; IR ( $\nu$ ,  $\text{cm}^{-1}$ ): 3332, 3219, 3096, 2678, 1675, 1624, 1606, 1441, 1355, 1201, 1165, 1124, 1106, 1014, 982, 922; Elemental analysis: Calcd (%) for  $\text{C}_{10}\text{H}_{16}\text{N}_{26}\text{O}_2$  (532.41): C, 22.56; H, 3.03; N, 68.40; Found: C 22.68, H 3.05, N 67.43.

### Synthesis of compound 9

The mixture of compound **2** (0.50 g, 2.2 mmol) and NaOH (0.35 g, 8.8 mmol) in water (30mL) was heated in a sealed stainless-steel tube at  $140\text{ }^{\circ}\text{C}$  using an oil-bath for 12 h. The resulting clear solution was poured into ice (50 mL) and acidified with 2N HCl to pH 1. The resulting white crystalline (monohydrate) solid was filtered and washed with water (3 x 20 mL). **(9)**: Physical description: Crystalline white solid. Yield: (0.40 g, 80%);  $T_{\text{d (onset)}} = 242\text{ }^{\circ}\text{C}$ ;  $^1\text{H}$  NMR (300 MHz, ppm,  $d_6$ -DMSO): 9.28 (br, 2H);  $^{13}\text{C}$  NMR (75 MHz, ppm,  $d_6$ -DMSO): 147.6, 144.1; IR ( $\nu$ ,  $\text{cm}^{-1}$ ): 3008, 2860, 1618, 1571, 1521, 1445, 1386, 1349, 1226, 1123, 1110, 1096, 1010, 955, 910; Elemental analysis: Calcd (%) for  $\text{C}_4\text{H}_2\text{N}_{10}\text{O}_3\cdot\text{H}_2\text{O}$  (222.14): C, 21.43; H, 1.80; N, 62.49; Found: C, 21.37; H, 1.84; N, 62.55.

### References

1. G. M. Sheldrick, *Acta Cryst.*, 2008, **A64**, 339-341.
2. G. M. Sheldrick, *Acta Crystallogr. Sect. A Found. Adv.* 2015, **71**, 3–8.
3. O. V. Dolomanov, L. J. Bourhis, R. J. Gildea, J. A. K. Howard, H. Puschmann, *J. Appl. Crystallogr.* 2009, **42**, 339–341.

4. R. G. Parr, Y. Weitao, *Density-Functional Theory of Atoms and Molecules*; *Oxford University Press*, 1995.
5. O. Suleimenov, T.-K. Ha, *Chem. Phys. Lett.* 1998, **290**, 451–457.
6. H. D. B. Jenkins, D. Tudela, L. Glasser, *Inorg. Chem.* 2002, **41**, 2364–2367.
7. M. S. Westwell, M. S. Searle, D. J. Wales, D. H. Williams, *J. Am. Chem. Soc.* 1995, **117**, 5013–5015.
8. H. Huang, Z. Zhou, L. Liang, J. Song, K. Wang, D. Cao, C. Bian, W. Sun, M. Xue, Z. *Anorg. Allg. Chem.* 2012, **638**, 392–400.
9. G. Zhao, C. He, H. Gao, G. H. Imler, D. A. Parrish, J. M. Shreeve, *New J. Chem.* 2018, **42**, 16162–16166.
10. D. Chand, D. A. Parrish, J. M. Shreeve, *J. Mater. Chem. A* 2013, **1**, 15383–15389.
11. D. Fischer, T. M. Klapötke, M. Reymann, J. Stierstorfer, *Chem. – A Eur. J.* 2014, **20**, 6401–6411.

## Crystal Structure Data

**Table S1:** Crystal data and structure refinement for compounds **3**, **5**, and **6**.

| <b>Compound</b>              | <b>3</b>                                                    | <b>5</b>                                        | <b>6</b>                                                     |
|------------------------------|-------------------------------------------------------------|-------------------------------------------------|--------------------------------------------------------------|
| CCDC #                       | 2216920                                                     | 2216921                                         | 2216922                                                      |
| Formula                      | C <sub>2</sub> H <sub>5</sub> N <sub>6</sub> O <sub>2</sub> | C <sub>5</sub> H <sub>8</sub> N <sub>13</sub> O | C <sub>4</sub> H <sub>2</sub> N <sub>10</sub> O <sub>2</sub> |
| $d_{calc.}/\text{g cm}^{-3}$ | 1.838                                                       | 1.748                                           | 1.803                                                        |
| $\mu/\text{mm}^{-1}$         | 1.395                                                       | 1.189                                           | 1.319                                                        |
| Formula Weight               | 145.12                                                      | 266.24                                          | 222.16                                                       |
| Color                        | colorless                                                   | colorless                                       | yellow                                                       |
| Shape                        | needle-shaped                                               | hexagonal-shaped                                | plate-shaped                                                 |
| Size/mm <sup>3</sup>         | 0.33×0.03×0.02                                              | 0.08×0.06×0.01                                  | 0.14×0.12×0.01                                               |
| $T/\text{K}$                 | 100.00(10)                                                  | 100.00(10)                                      | 100.00(10)                                                   |
| Crystal System               | monoclinic                                                  | monoclinic                                      | orthorhombic                                                 |
| Flack Parameter              | -                                                           | -                                               | -0.1(4)                                                      |
| Hooft Parameter              | -                                                           | -                                               | -0.0(2)                                                      |
| Space Group                  | $P2_1/n$                                                    | $C2/c$                                          | $P2_12_12_1$                                                 |
| $a/\text{Å}$                 | 3.6274(2)                                                   | 12.3231(3)                                      | 5.9741(3)                                                    |
| $b/\text{Å}$                 | 13.3429(6)                                                  | 7.9468(2)                                       | 9.6391(4)                                                    |
| $c/\text{Å}$                 | 10.8736(7)                                                  | 20.7961(6)                                      | 14.2140(7)                                                   |
| $\alpha^\circ$               | 90                                                          | 90                                              | 90                                                           |
| $\beta^\circ$                | 94.721(5)                                                   | 96.465(2)                                       | 90                                                           |
| $\gamma^\circ$               | 90                                                          | 90                                              | 90                                                           |
| $V/\text{Å}^3$               | 524.49(5)                                                   | 2023.60(9)                                      | 818.51(7)                                                    |
| $Z$                          | 4                                                           | 8                                               | 4                                                            |
| $Z'$                         | 1                                                           | 1                                               | 1                                                            |
| Wavelength/Å                 | 1.54184                                                     | 1.54184                                         | 1.54184                                                      |
| Radiation type               | Cu K $_{\alpha}$                                            | Cu K $_{\alpha}$                                | Cu K $_{\alpha}$                                             |
| $Q_{min}^\circ$              | 5.258                                                       | 4.279                                           | 5.545                                                        |
| $Q_{max}^\circ$              | 79.488                                                      | 79.879                                          | 79.724                                                       |
| Measured Refl's.             | 3418                                                        | 6800                                            | 5184                                                         |
| Indep't Refl's               | 1100                                                        | 2097                                            | 1677                                                         |
| Refl's $I \geq 2 \sigma(I)$  | 988                                                         | 1880                                            | 1560                                                         |
| $R_{int}$                    | 0.0462                                                      | 0.0210                                          | 0.0603                                                       |
| Parameters                   | 111                                                         | 204                                             | 153                                                          |
| Restraints                   | 0                                                           | 0                                               | 0                                                            |
| Largest Peak                 | 0.333                                                       | 0.405                                           | 0.534                                                        |
| Deepest Hole                 | -0.348                                                      | -0.236                                          | -0.266                                                       |
| Goof                         | 1.095                                                       | 1.124                                           | 1.093                                                        |
| $wR_2$ (all data)            | 0.1336                                                      | 0.1063                                          | 0.1446                                                       |
| $wR_2$                       | 0.1292                                                      | 0.1021                                          | 0.1414                                                       |
| $R_1$ (all data)             | 0.0508                                                      | 0.0489                                          | 0.0578                                                       |
| $R_1$                        | 0.0462                                                      | 0.0416                                          | 0.0544                                                       |

**Table S2:** Hydrogen bond information for compound **3**.

| <b>D</b> | <b>H</b> | <b>A</b>        | <b>d(D-H)/Å</b> | <b>d(H-A)/Å</b> | <b>d(D-A)/Å</b> | <b>D-H-A/deg</b> |
|----------|----------|-----------------|-----------------|-----------------|-----------------|------------------|
| O1       | H1       | N4 <sup>1</sup> | 0.84(3)         | 2.04(3)         | 2.776(2)        | 146(3)           |
| O1       | H1       | O2 <sup>2</sup> | 0.84(3)         | 2.41(3)         | 3.008 (2)       | 129(2)           |
| O2       | H2       | N5 <sup>1</sup> | 0.95(4)         | 1.64(4)         | 2.582(2)        | 174(3)           |
| N6       | H6A      | N3 <sup>3</sup> | 0.92(3)         | 1.99(3)         | 2.825(2)        | 150(2)           |
| N6       | H6B      | O1              | 0.88(3)         | 2.12(3)         | 2.841(2)        | 140(2)           |
| N6       | H6B      | N2 <sup>4</sup> | 0.88(3)         | 2.38(3)         | 2.862(2)        | 115(2)           |
| N6       | H6C      | O2 <sup>4</sup> | 0.91(3)         | 1.92(3)         | 2.828(2)        | 174(2)           |



# $^1\text{H}$ and $^{13}\text{C}$ -NMR spectra of compounds 3-9

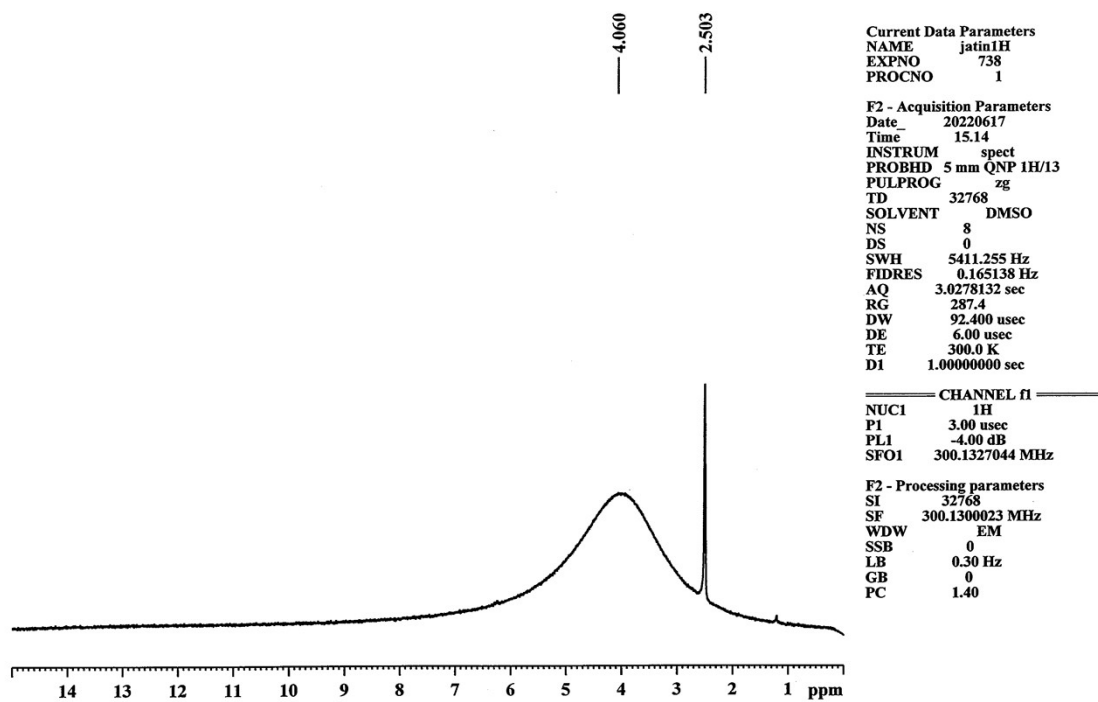

Figure S1:  $^1\text{H}$  NMR spectra of compound 1.

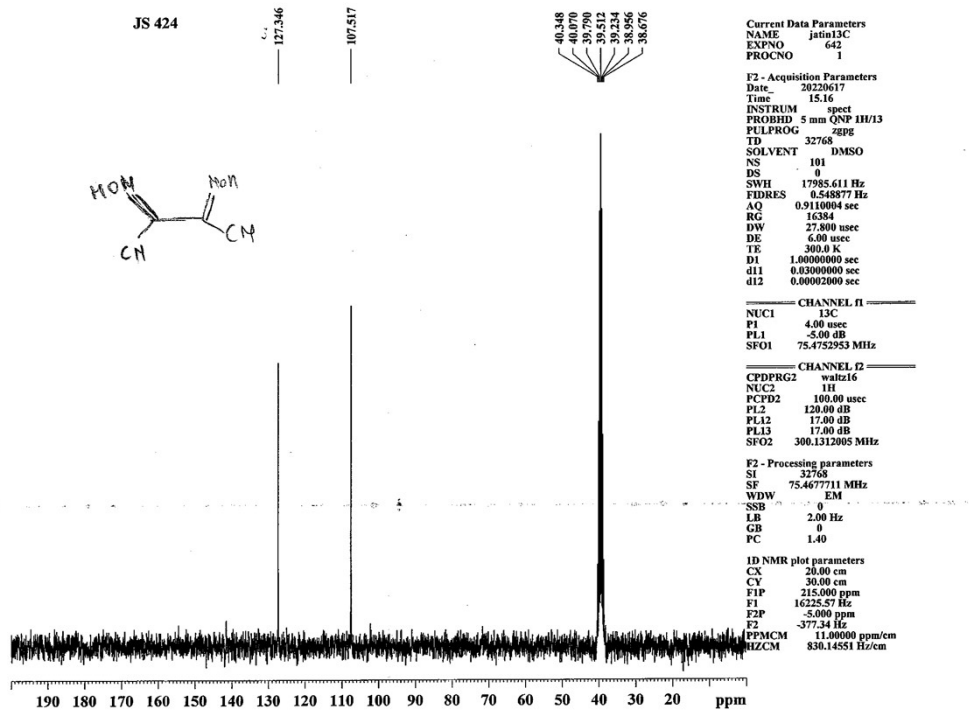

Figure S2: <sup>13</sup>C NMR spectra of compound 1.

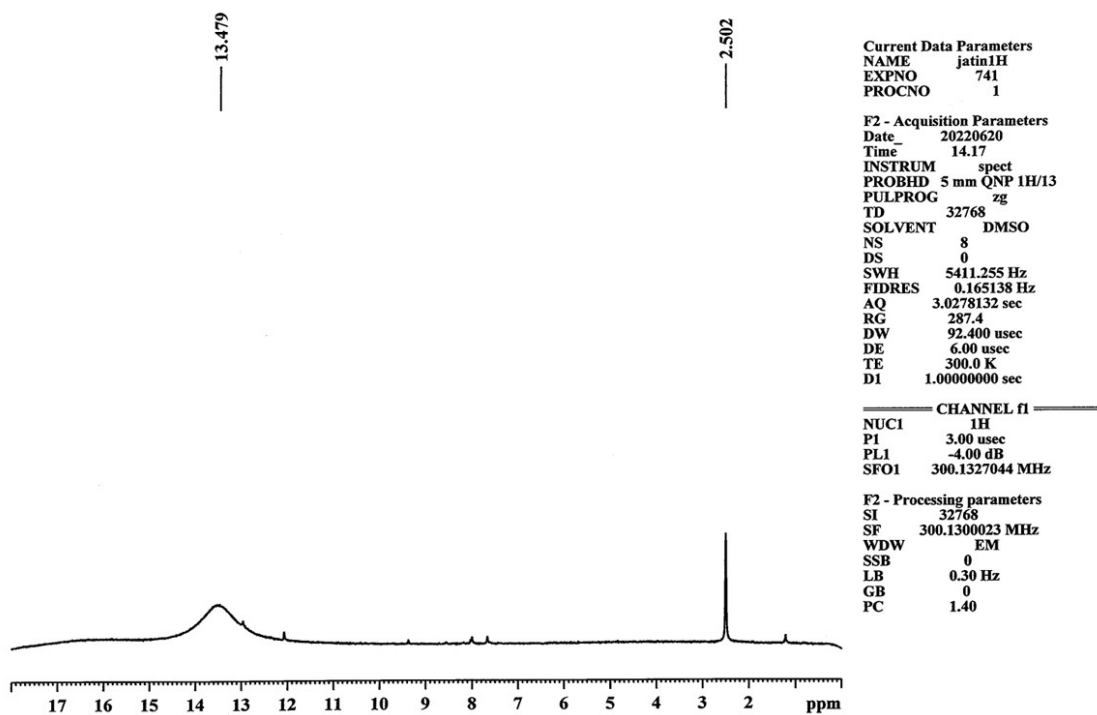

Figure S3: <sup>1</sup>H NMR spectra of compound 2.

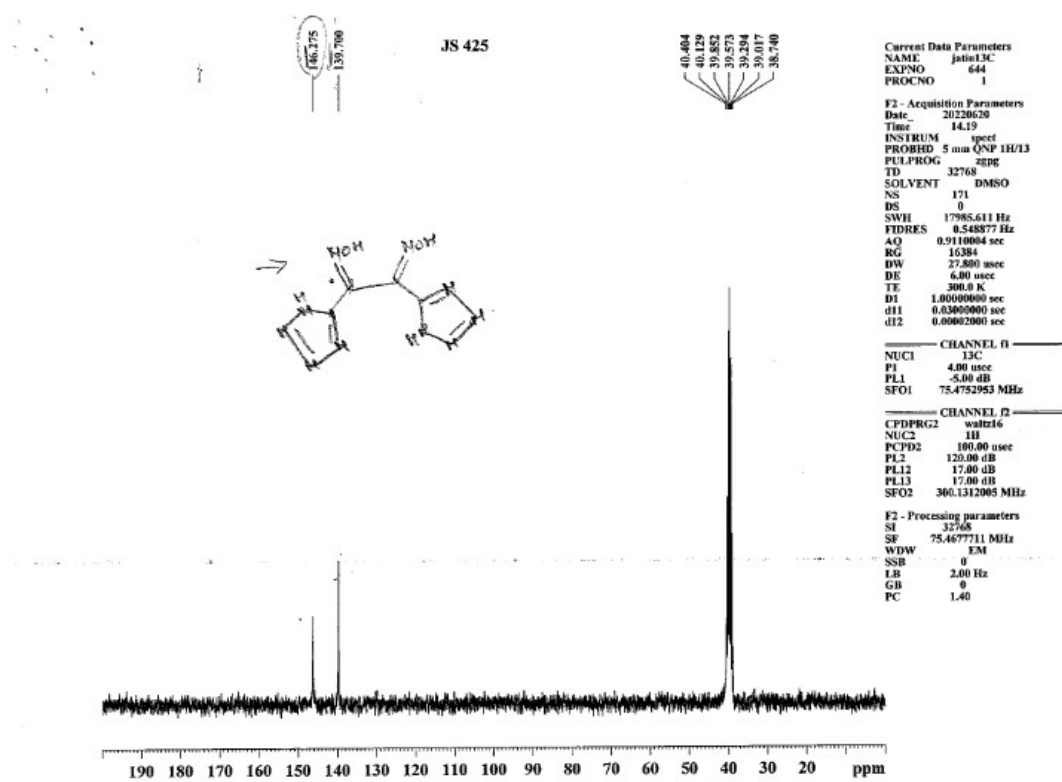

Figure S4: <sup>13</sup>C NMR spectra of compound 2.

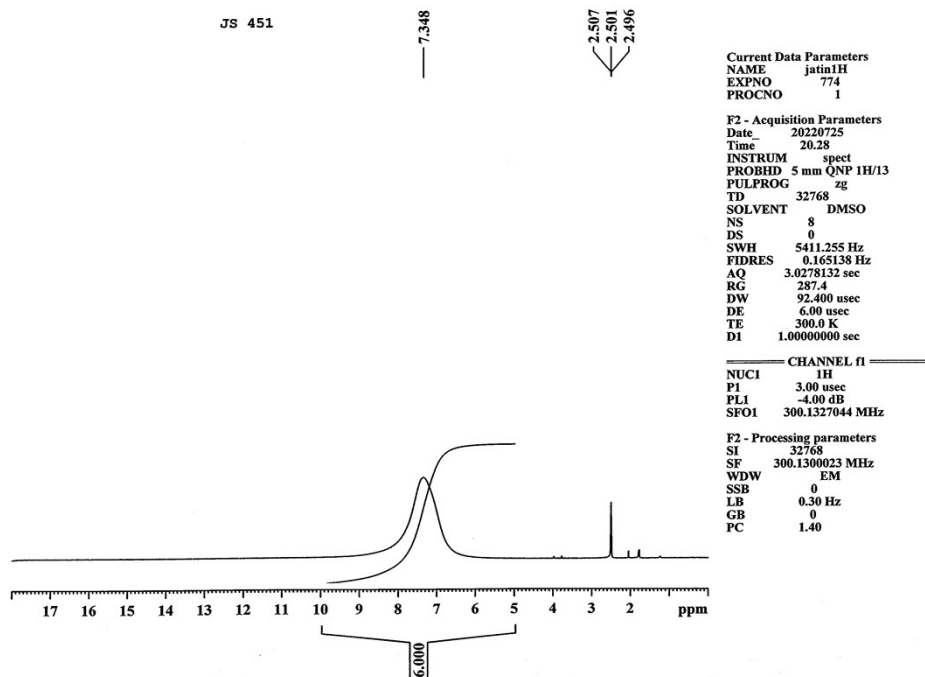

Figure S5: <sup>1</sup>H NMR spectra of compound 3.

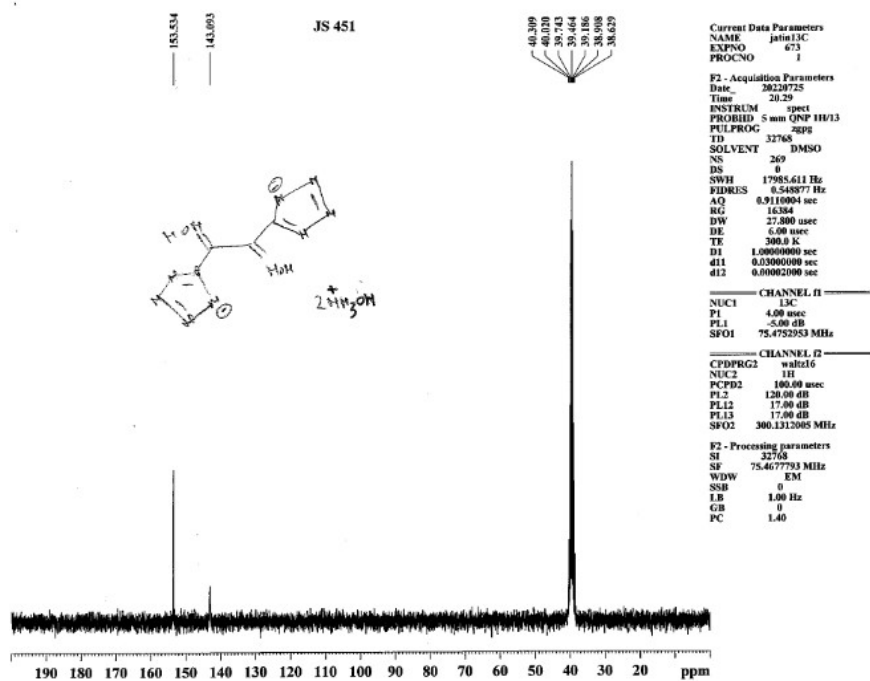

Figure S6:  $^{13}\text{C}$  NMR spectra of compound 3.

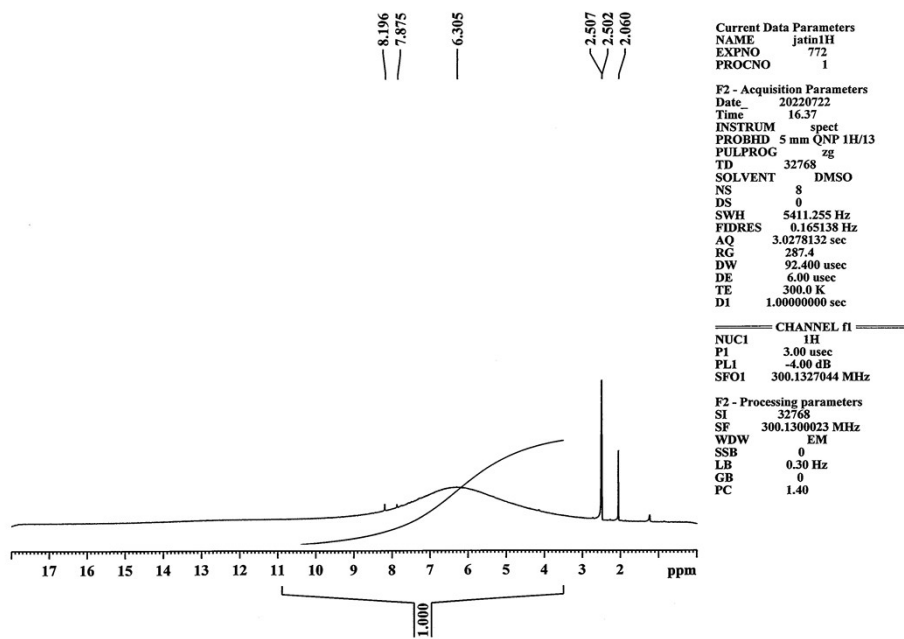

Figure S7:  $^1\text{H}$  NMR spectra of compound 4.

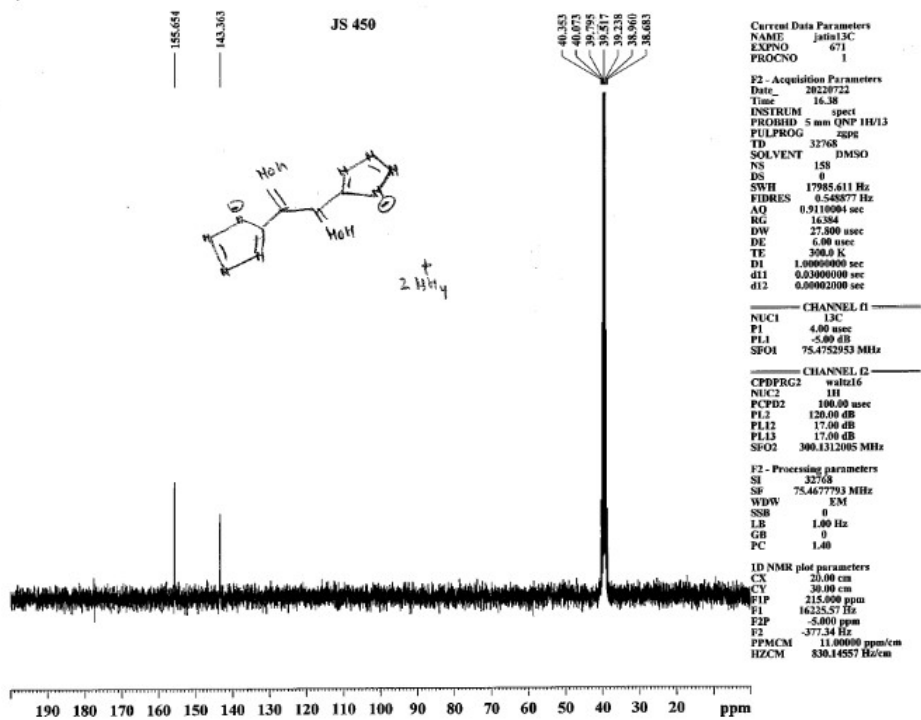

Figure S8: <sup>13</sup>C NMR spectra of compound 4.

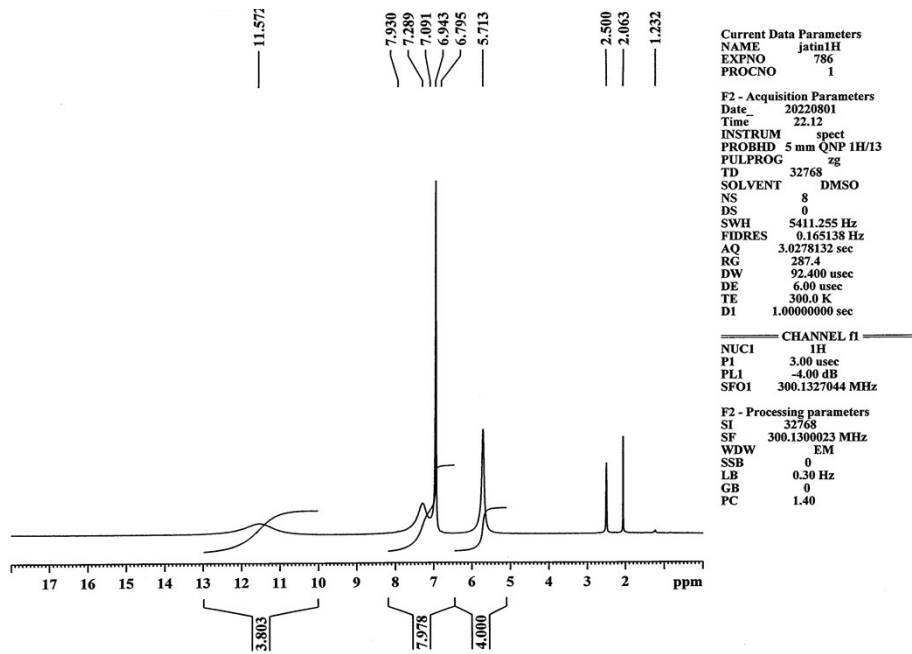

Figure S9: <sup>1</sup>H NMR spectra of compound 5.

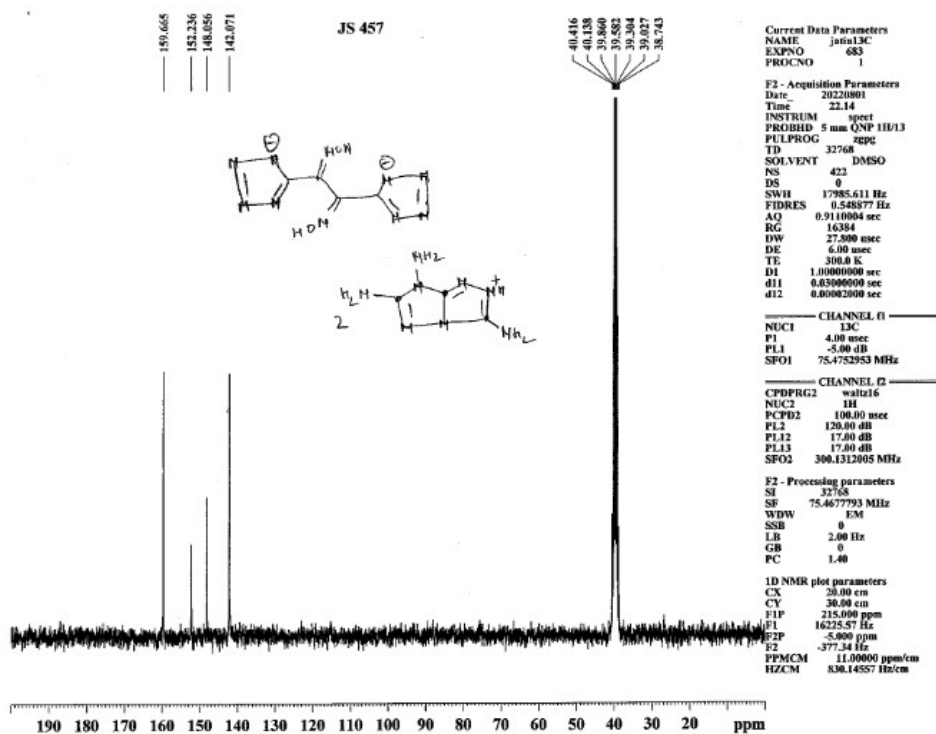

Figure S10: <sup>13</sup>C NMR spectra of compound 5.

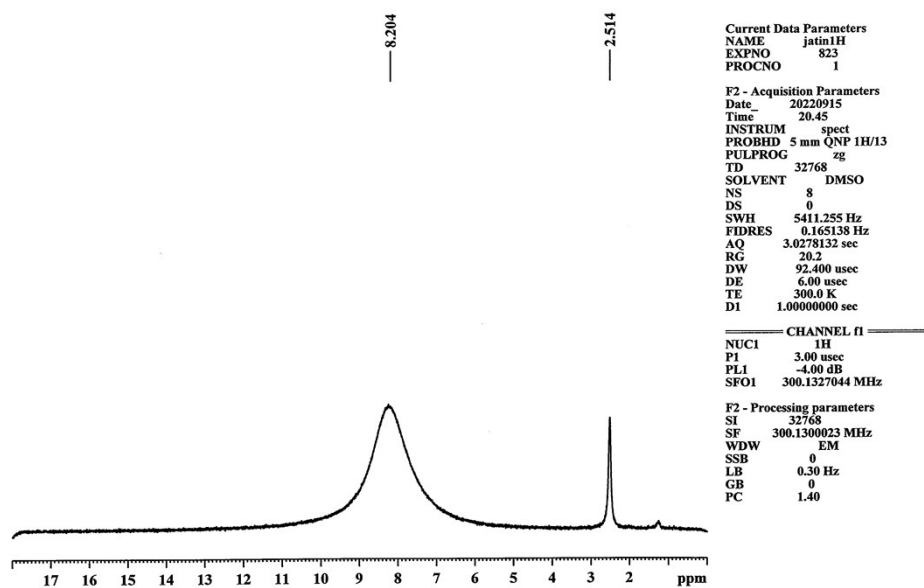

Figure S11:  $^1\text{H}$  NMR spectra of compound **6**.



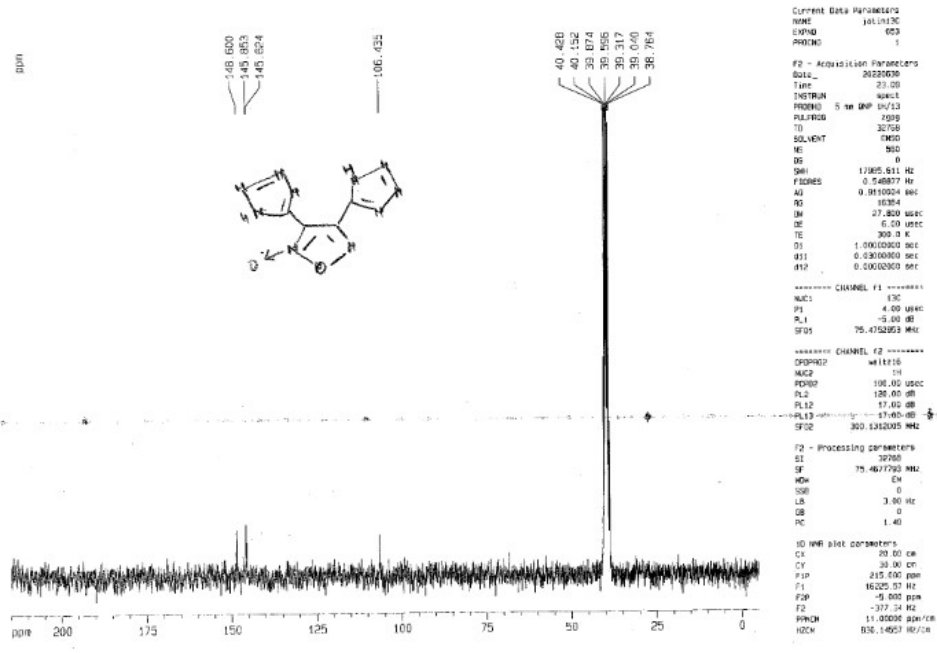

Figure S12: <sup>13</sup>C NMR spectra of compound 6.

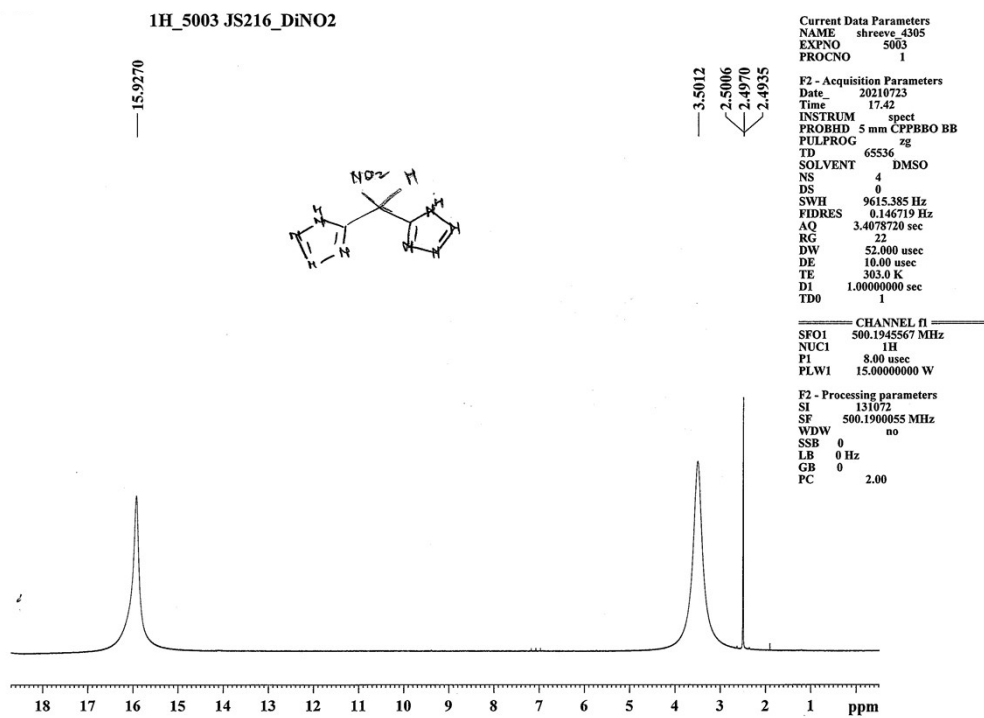

Figure S13: <sup>1</sup>H NMR spectra of compound 8.

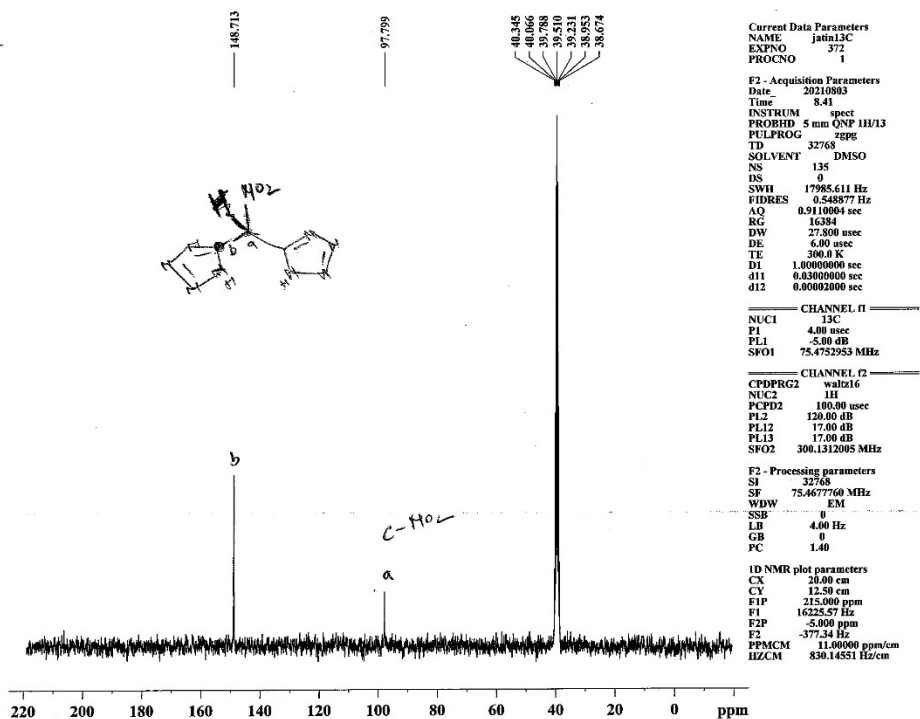

Figure S14: <sup>13</sup>C NMR spectra of compound 8.

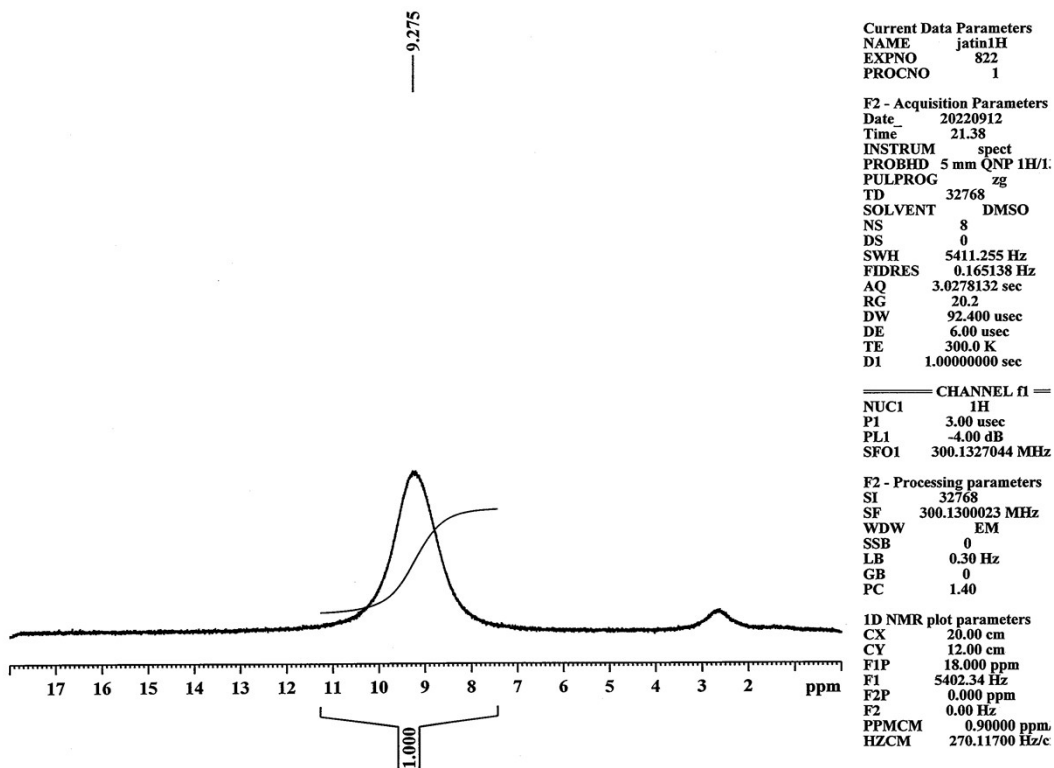

Figure S15: <sup>1</sup>H NMR spectra of compound 9.

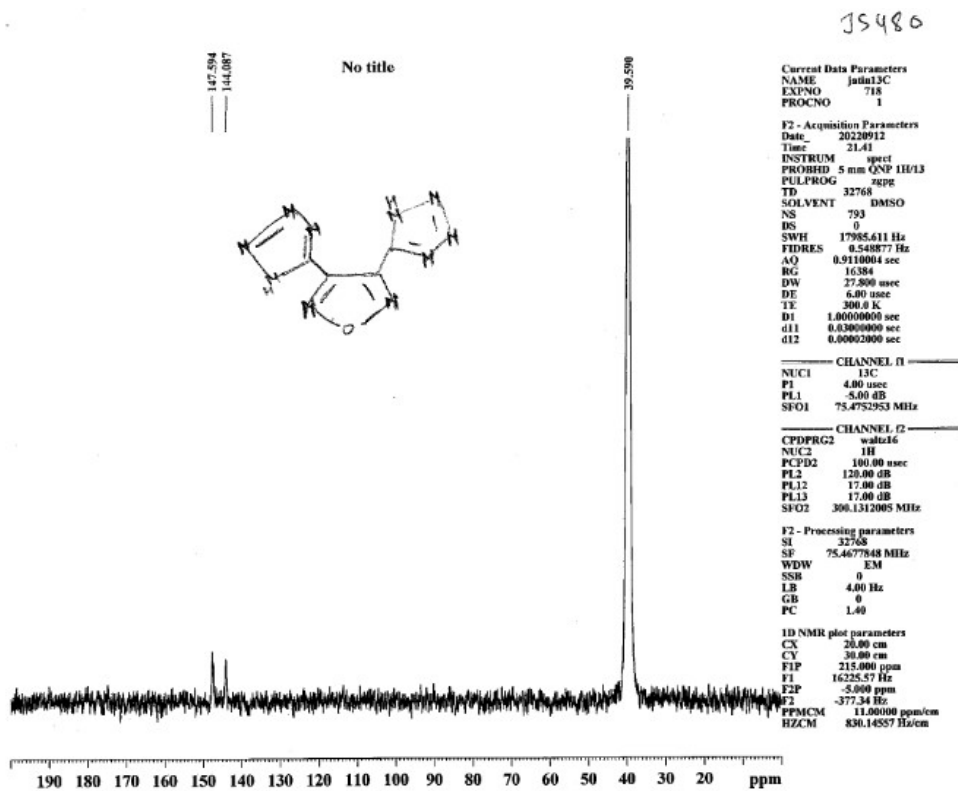

Figure S16:  $^{13}\text{C}$  NMR spectra of compound 9.
